# Supplementary material
Source: Research Square preprint supplement (doi:10.21203/rs.3.rs-9698597/v1)
Supplement: Supplementary file 1 [file 9935a2ce4188b51195b8cdd4.docx]

**Supplementary Methods**

**I．Approach to identify ARDS patients**

To identify ARDS patients in the CDIC cohort, we first extracted all cases of acute respiratory failure requiring mechanical ventilation. Experienced intensivists and radiologists then reviewed each patient’s medical history, radiographs (lung CT or chest X-ray), blood gases, and PEEP levels to confirm ARDS based on the Berlin definition. In cases of diagnostic disagreement, the final decision was made by a senior intensivist.

**II．Data Collection**

Respiratory variables included respiratory rate, tidal volume, minute ventilation, positive end–expiratory pressure (PEEP), peak pressure (Ppeak) and Plateau pressure (Pplat) were obtained. For patients who received ventilation in a volume–controlled assist mode, driving pressure (ΔP) was calculated as Pplat minus PEEP, if not specified, Ppeak was considered equal to Pplat in pressure-regulated modes other than pressure support ventilation. Mechanical power (MP) was calculated as [ 0·098*respiratory rate*tidal volume*(Ppeak–(0·5*ΔP))]. Ventilatory ratio is defined as [minute ventilation * arterial PCO2/ [predicted body weight (PBW) * 100 * 37.5], PBW was calculated as equal to [50 + 0.91 (centimeters of height – 152.4)] in males, and [45.5 + 0.91 (centimeters of height – 152.4)] in females.

Hemodynamic variables (heart rate, systolic blood pressure, diastolic blood pressure, use of vasopressor and lactate level), markers of organ dysfunction and injury (platelets, creatinine, bilirubin and PaO2/FiO2 ratio) and other variables (temperature, hemoglobin, sodium, glucose, bicarbonate, and pH) were also collected.

Longitudinal data were collected from Day 1 until death, ICU discharge, liberation from mechanical ventilation, or Day 7 in the ICU, whichever came first. We defined ΔP > 40 cmH₂O, respiratory rates >60 breaths/min, and tidal volumes >20 mL/kg PBW as outliers, as these physiologically improbable values were assumed to be erroneous. Outliers were transformed into missing values and imputed using the Multiple Imputations by Chained Equations (MICE) method.

Outcomes were 28-day mortality, ICU mortality, hospital mortality, and extrapulmonary organ dysfunction. Organ dysfunction was defined as a SOFA score ≥1 for any organ system. Daily SOFA scores were calculated using the most abnormal values for each organ. New-onset organ dysfunction was defined as a ≥1-point increase in organ-specific SOFA score within 7 days among patients without that organ dysfunction at baseline. For cardiovascular dysfunction, further assessment is conducted using the Vasoactive-Inotropic Score (VIS) to evaluate cardiovascular function. Considering the high proportion of ARDS patients receiving sedative analgesics, the Glasgow Coma Scale (GCS) score may not accurately reflect neurological function, so neurological dysfunction is not calculated.

**III．Data preprocessing**

Before performing LPA, we first assessed the distributions and missingness of candidate variables. We assumed the data were “missing at random” and applied multiple imputation by chained equations (MICE) to generate missing values based on observed patient data. A total of five imputed datasets (n = 5) were created using weighted predictive mean matching. The imputation was performed in R Studio using the ‘mice’ package (<https://cran.r-project.org/web/packages/mice>). And stand[Monti, 2003 #32]ardized transformation was used for the dataset.

**Supplementary Tables**

**Supplemental Table 1: Characteristics of Cohort and Clinical Trial**

|  | **Derivation Cohort** | **Validation Cohort** |
| --- | --- | --- |
|  | CDIC | ALVEOLI |
| No. of patients | 769 | 549 |
| Enrollment period | 2014-2022 | 1999-2002 |
| Inclusion criteria | Patients with ARDS and received invasive mechanical ventilation. (Berlin definition) | Patients with ARDS and received invasive mechanical ventilation.  (AECC definition) |
| Outcomes | 28-day mortality, ventilator-free days,  ICU mortality, hospital mortality,  and extrapulmonary organ dysfunction. | 28-day mortality, ventilator-free days and extrapulmonary organ dysfunction. |

**Supplemental Table 2: Clinical variables for phenotyping in different datasets**

|  | **CDIC** | **ALVEOLI** |
| --- | --- | --- |
| Minute ventilation | √ | √ |
| Driving pressure | √ | √ |
| Mechanical power | √ | √ |
| Ventilatory ratio | √ | √ |
| PaO2/FiO2 ratio | √ | √ |
| PaCO2 | √ | √ |
| pH | √ | √ |
| Compliance | √ | √ |

PEEP= positive end-expiratory pressure; PaO2=partial pressure of oxygen; FiO2=fraction of inspired oxygen.

**Supplemental Table 3: Clinical characteristics of ARDS patients in CDIC at the start of mechanical ventilation**

|  | **All**  **(n=769)** | **Alive** **at Day 28**  **(n=513)** | **Dead at Day 28**  **(n=256)** | ***P-*value** |
| --- | --- | --- | --- | --- |
| Age (years) | 65.0 (52-76) | 65.0 (50-75) | 69.0 (56-78) | <0.001 |
| BMI，kg/m² | 23.7 (21.2-26.1) | 24.0 (21.6-26.1) | 23.4 (20.8-25.0) | 0.045 |
| Male (gender), *n* (%) | 549 (71.4) | 372 (72.5) | 177 (69.1) | 0.352 |
| **ARDS Primary risk factor, n (%)** |  |  |  | 0.004 |
| Pneumonia | 476 (61.8) | 301 (58.6) | 175(68.3) |  |
| Sepsis | 125 (16.3) | 84 (16.4) | 41 (16.0) |  |
| Aspiration | 79(10.2) | 54(10.5) | 25(9.7) |  |
| Trauma | 56 (7.3) | 46 (9.0) | 10 (3.9) |  |
| Other | 33 (4.3) | 28 (5.5) | 5 (2.0) |  |
| **Comorbidities, n (%)** |  |  |  |  |
| Hypertension | 334 (43.4) | 206 (40.2) | 128 (50.0) | 0.011 |
| Diabetes，n (%) | 161 (20.9) | 99 (19.3) | 62 (24.2) | 0.132 |
| Chronic heart failure | 87 (11.3) | 46 (9.0) | 41 (16.0) | 0.005 |
| Coronary heart disease | 105 (13.7) | 54 (10.5) | 51 (19.9) | 0.001 |
| Chronic renal diseases | 76 (9.9) | 40 (7.8) | 36 (14.1) | 0.007 |
| COPD | 44 (5.7) | 28 (5.5) | 16 (6.2) | 0.742 |
| **Vital signs** |  |  |  |  |
| Temperature (℃) | 38.0 (37.3-38.6) | 38.0 (37.3-38.6) | 37.9 (37.3-38.6) | 0.856 |
| Respiratory rate (breaths min−1 ) | 28 (24-32) | 27 (24-31) | 30 (26-34) | <0.001 |
| Heart rate (beats min−1 ) | 121 (108-137) | 118 (105-131) | 127 (114-143) | <0.001 |
| MAP (mmHg) | 71 (64-78) | 72(65-79) | 68 (62-75) | <0.001 |
| **Laboratory data** |  |  |  |  |
| White blood cell count (109/L) | 11.4 (7.7-15.9) | 11.5 (8.2-15.7) | 11.0 (7.2-16.4) | 0.261 |
| Hemoglobin (g/L) | 102.0 (85.0-117.0) | 103 .0(87.0-117.9) | 97.8 (84.3-115.3) | 0.05 |
| Platelet count (109/L) | 136.0 (80.0-201.5) | 143 (90.1-204.0) | 118 (64.8-195.0) | 0.007 |
| BUN (mg/dl) | 9.9 (7.0-16.3) | 9.4 (6.6-15.2) | 11.7 (7.7-19.1) | <0.001 |
| Creatinine (umol/L) | 107.0 (75.0-181.0) | 101.0 (73.0-163.0) | 119.0 (80.0-213.0) | 0.001 |
| TBIL (umol/L) | 15.5 (9.9-26.5) | 15.9 (10.1-26.1) | 14.8 (9.3-28.2) | 0.625 |
| CRP (mg/L) | 132.0 (70.4-207.0) | 126.0 (62.5-208.7) | 144 (84.0-197.5) | 0.095 |
| Procalcitonin (ng/L) | 3.63 (0.98.-10.41) | 3.08 (0.939.93) | 4.66 (1.18-10.78) | 0.082 |
| pH | 7.38 (7.33-7.42) | 7.39 (7.35-7.42) | 7.36 (7.30-7.40) | <0.001 |
| PaO2 (mm Hg) | 89.6 (78.9-103.8) | 90.9 (80.9-104.7) | 86.2 (76.0-101.8) | 0.015 |
| PaCO2 (mm Hg) | 36.4 (32. 5-40.7) | 36.6 (31.9-43.6) | 36.5 (32.4-41.4) | 0.313 |
| Bicarbonate (mmol/L) | 22.1 (19.7-24.3) | 20.6 (18.3-23.3) | 21.8 (19.2-24.1) | <0.001 |
| PaO2/FiO2 ratio (mm Hg) | 154.0 (111.7-201.8) | 162.0(120.3-207.4) | 137.0 (92.8-181.4) | <0.001 |
| Lactate，mmol/L | 1.78 (1.304-2.63) | 1.66 (1.27-2.29) | 2.13 (1.46-3.54) | <0.001 |
| **Parameters of mechanical ventilation** | | | |  |
| Tidal volume (ml/kg PBW) | 6.7 (6.0-7.4) | 6.7 (6.1-7.4) | 6.5 (5.8-7.3) | 0.063 |
| Minute ventilation (L/min) | 7.8 (6.8-8.9) | 7.7 (6.8-8.8) | 8.2 (6.8-9.3) | 0.007 |
| Driving pressure (cmH2O) | 11.5 (9.9-13.6) | 11.3 (9.8-13.2) | 11.8 (9.9-14.7) | 0.014 |
| Compliance (ml/cmH2O) | 37.9 (29.4-46.8) | 38.6 (30.4-46.6) | 35.0 (28.1-46.8) | 0.027 |
| Mechanical power (J/min) | 11.5 (9.3-14.2) | 11.0 (9.1-13.0) | 12.8 (10.2-15.9) | <0.001 |
| Ventilatory ratio | 1.42 (1.18-1.78) | 1.38 (1.16-1.69) | 1.53 (1.25-1.98) | <0.001 |
| APACHE II score | 23.0±8.4 | 22.0±8.5 | 24.6±8.2 | 0.057 |
| SOFA score | 8.0(6.0-11.0) | 8.0 (6.0-10.0) | 10.0 (7.0-12.0) | 0.235 |
| ARDS= acute respiratory distress syndrome; BMI= Body mass index; PaO2=partial pressure of oxygen; PaCO2=partial pressure of Carbon Dioxide; FiO2=fraction of inspired oxygen; MAP=mean arterial blood pressure; BUN= Blood urea nitrogen; TBIL: Total Bilirubin; CRP: C-Reactive Protein; PBW=Predicted body weight; SOFA= Sequential organ failure assessment; APACHE= Acute Physiology and Chronic Health Evaluation II. | | | | |

**Supplemental Table 4: Clinical characteristics and outcomes of respiratory phenotypes in ALVEOLI**

|  | **Class1 (n=276)** | **Class 2 (n=61)** | **Class 3 (n=212)** | ***P-*value** |
| --- | --- | --- | --- | --- |
| Age (years) | 52.5 (39-67) | 47.0 (39-60) | 49.0 (37-63) | 0.437 |
| BMI，kg/m² | 26.1 (22.2-30.0) | 25.3 (22.8-30.3) | 25.9 (22.0-30.7) | 0.806 |
| Male (gender), *n* (%) | 146 (52.9%) | 32 (52.5%) | 124 (58.5%) | 0.428 |
| **ARDS Primary risk factor, n (%)** |  |  |  | 0.128 |
| Pneumonia | 101 (36.6%) | 29 (47.5%) | 91 (42.9%) |  |
| Sepsis (non-pulmonary) | 52 (18.8%) | 17 (27.9%) | 51 (24.1%) |  |
| Aspiration | 48 (17.4%) | 7 (11.5%) | 29 (13.7%) |  |
| Trauma | 28 (10.1%) | 3 (4.9%) | 14 (6.6%) |  |
| Other | 47 (17.0%) | 5 (8.2%) | 27 (12.7%) |  |
| **Vital signs** |  |  |  |  |
| Temperature (℃) | 38.4 (± 0.9) | 38.5 (± 1.1) | 38.5 (±0.9) | 0.58 |
| Respiratory rate (breaths min−1) | 28.0 (22-35) | 38.0 (34-42) | 35.0 (28-40) | <0.001 |
| Heart rate (beats min−1 ) | 121 (103-135) | 141 (120-156) | 126 (109-140.5) | <0.001 |
| MAP (mm Hg) | 62.0 (55-70) | 58.0 (51-63) | 60.0 (54-66) | 0.006 |
| **Laboratory data** |  |  |  |  |
| White blood cell count (109/L) | 12.9 (9.0-18.3) | 13.4 (6.7-18.9) | 12.8 (8.7-17.8) | 0.935 |
| Platelet count (109/L) | 152 (88-236) | 152 (72.8-219.3) | 154 (78.5-243.5) | 0.903 |
| BUN (mg/dl) | 20.0 (12-35) | 25.0 (16-38) | 22.0 (14-41) | 0.13 |
| Creatinine (mg/dL) | 1.0 (0.8-1.7) | 1.3 (0.9-2.3) | 1.1 (0.8-2.0) | 0.257 |
| TBIL (mg/dL) | 0.8 (0.5-1.3) | 0.8 (0.4-1.5) | 0.9 (0.5-1.8) | 0.825 |
| pH | 7.42 (7.37-7.455) | 7.25 (7.18-7.34) | 7.37 (7.3-7.42) | <0.001 |
| PaO2(mm Hg) | 79.0 (67-100) | 80.0 (65-96.75) | 74.0 (64-89.5) | 0.263 |
| PaCO2 (mm Hg) | 38.0 (33-42) | 44.5 (38-55) | 39.0 (34.5-44) | <0.001 |
| PaO2/FiO2 ratio (mm Hg) | 138 (104.1-190) | 119 (91.6-170.6) | 137 (99.3-175.9) | 0.301 |
| **Parameters of mechanical ventilation in the first 24 h** | | | |  |
| Tidal volume (ml/kg PBW) | 7.0 (6.0-8.0) | 6.8 (5.9-7.9) | 6.7 (6.0-7.9) | 0.067 |
| Minute ventilation (L/min) | 9.6 (8.0-11) | 16.7 (15.2-19.6) | 13.9 (12-15.2) | <0.001 |
| Driving pressure (cmH2O) | 14.0 (11-17) | 18.0 (16-26) | 14.0 (12-19) | <0.001 |
| Compliance (ml/cmH20) | 31.4 (25.6-41.7) | 22.2 (16.5-29.3) | 29.4 (22.9-36.9) | <0.001 |
| Mechanical power (J/min) | 21.2 (16.4-25.5) | 50.0 (39.5-50.0) | 35.6 (29.4-44.7) | <0.001 |
| Ventilatory ratio | 1.44 (1.25-1.67) | 3.06 (2.73-3.44) | 2.15 (1.91-2.44) | <0.001 |
| **Outcomes** |  |  |  |  |
| Mortality at day 28, n (%) | 38 (13.8%) | 27 (44.3%) | 60 (28.3%) | <0.001 |
| Ventilator-free days | 22.0 (14-24) | 0 (0-17) | 15.5 (0-21.25) | <0.001 |
| Cardiovascular dysfunction | 166 (60.1%) | 46 (75.4%) | 146 (68.9%) | 0.029 |
| Use of Vasopressors, n (%) | 68 (24.6%) | 32 (52.5%) | 88 (41.5%) | <0.001 |
| Kidney dysfunction | 73 (26.4%) | 23 (37.7%) | 72 (34.0%) | 0.086 |
| Liver dysfunction | 38 (13.8%) | 8 (13.1%) | 43 (20.3%) | 0.134 |
| Hematologic dysfunction | 116 (42.0%) | 29 (47.5%) | 109 (51.4%) | 0.119 |

ARDS= acute respiratory distress syndrome; BMI= Body mass index; PaO2=partial pressure of oxygen; PaCO2=partial pressure of Carbon Dioxide; FiO2=fraction of inspired oxygen; MAP=mean arterial blood pressure; BUN= Blood urea nitrogen; TBIL: Total Bilirubin; CRP: C-Reactive Protein; PBW=Predicted body weight; SOFA= Sequential organ failure assessment; APACHE= Acute Physiology and Chronic Health Evaluation II.

**Supplemental Table 5: Adjusted Cox regression of 28-day mortality by phenotypes on Day 1**

|  |  | **Hazard ratio** | **95% CI** |
| --- | --- | --- | --- |
| The derivation cohort | Class 2 (vs 1) | 3.11 | 1.75-5.55 |
| Class3 (vs 1) | 1.39 | 0.86–2.25 |
| The validation cohort | Class 2 (vs 1) | 2.59 | 1.56-4.29 |
| Class 3 (vs 1) | 1.42 | 0.94-2.15 |

Cox regression were used to evaluate 28-day mortality across phenotypes, adjusting for baseline SOFA score, age, sex, and body mass index (BMI); CI: Confidence interval.

**Supplemental Table 6: Heterogeneity of treatment effect to PEEP strategy within phenotypes in the validation cohort ALVEOLI**

|  | **Class 1**  **(n = 276)** | | **Class 2**  **(n = 61)** | | **Class 3**  **(n = 212)** | |
| --- | --- | --- | --- | --- | --- | --- |
|  | **High PEEP**  **(n=130)** | **Low PEEP**  **(n=146)** | **High PEEP**  **(n=30)** | **Low PEEP**  **(n=31)** | **High PEEP**  **(n=116)** | **Low PEEP**  **(n=96)** |
| **60-d mortality, n (%)** | 22 (16.9) | 16 (10.9) | 14 (46.6) | 13 (41.9) | 28 (24.1) | 32 (33.3) |
| **Interaction**  **between phenotypes**  **and PEEP strategy** | reference | | 0.70 (0.26-1.88)  *p*=0.476 | | 0.43 (0.19-0.97)  *p*=0.041 | |
| - | | reference | | 0.61 (0.25-1.52)  p=0.287 | |

PEEP: positive end-expiratory pressure, HR: hazard ratio, CI: Confidence interval

**Supplementary Figures**

**Supplemental Figure 1 Patients selection on the CDIC cohort**


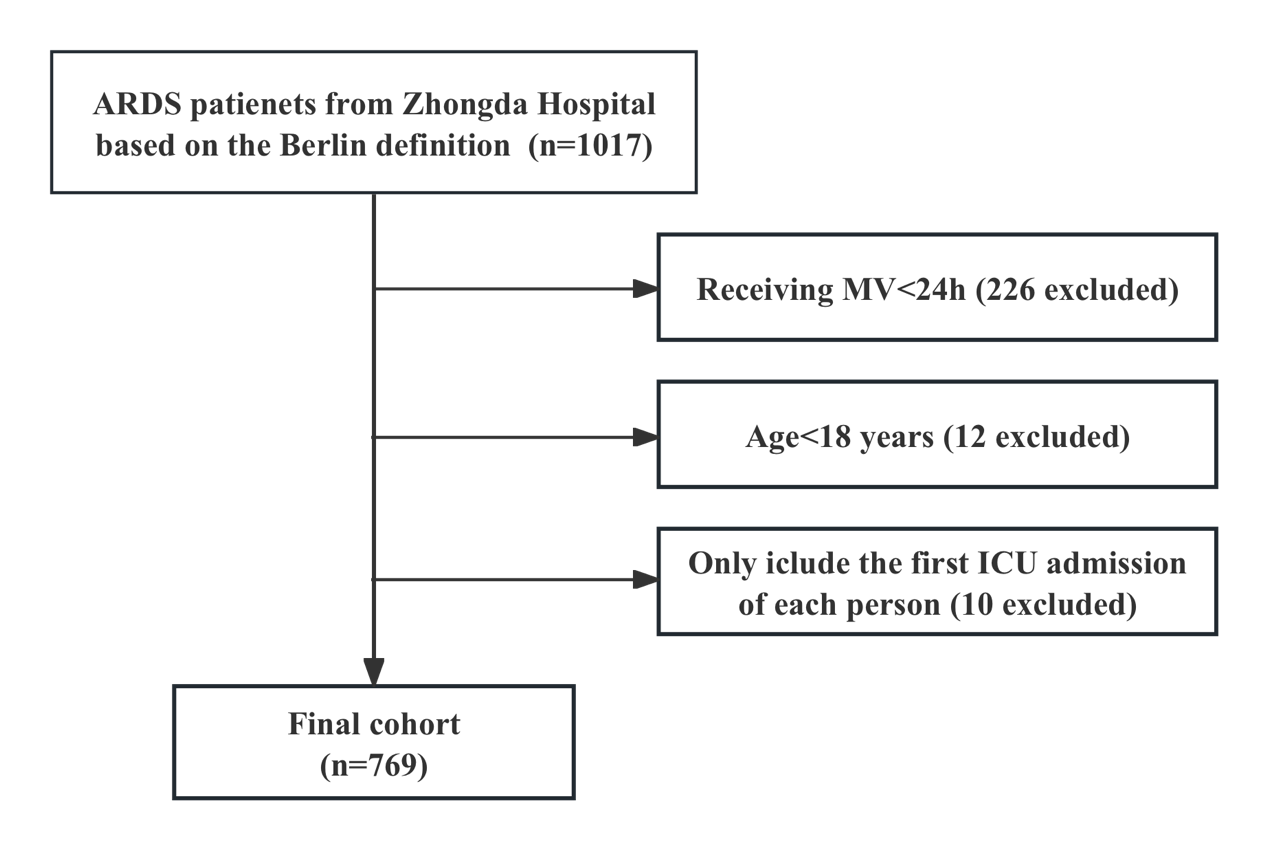


**Supplemental Figure 2 Consensus k-means clustering for phenotyping in the CDIC cohort**

**
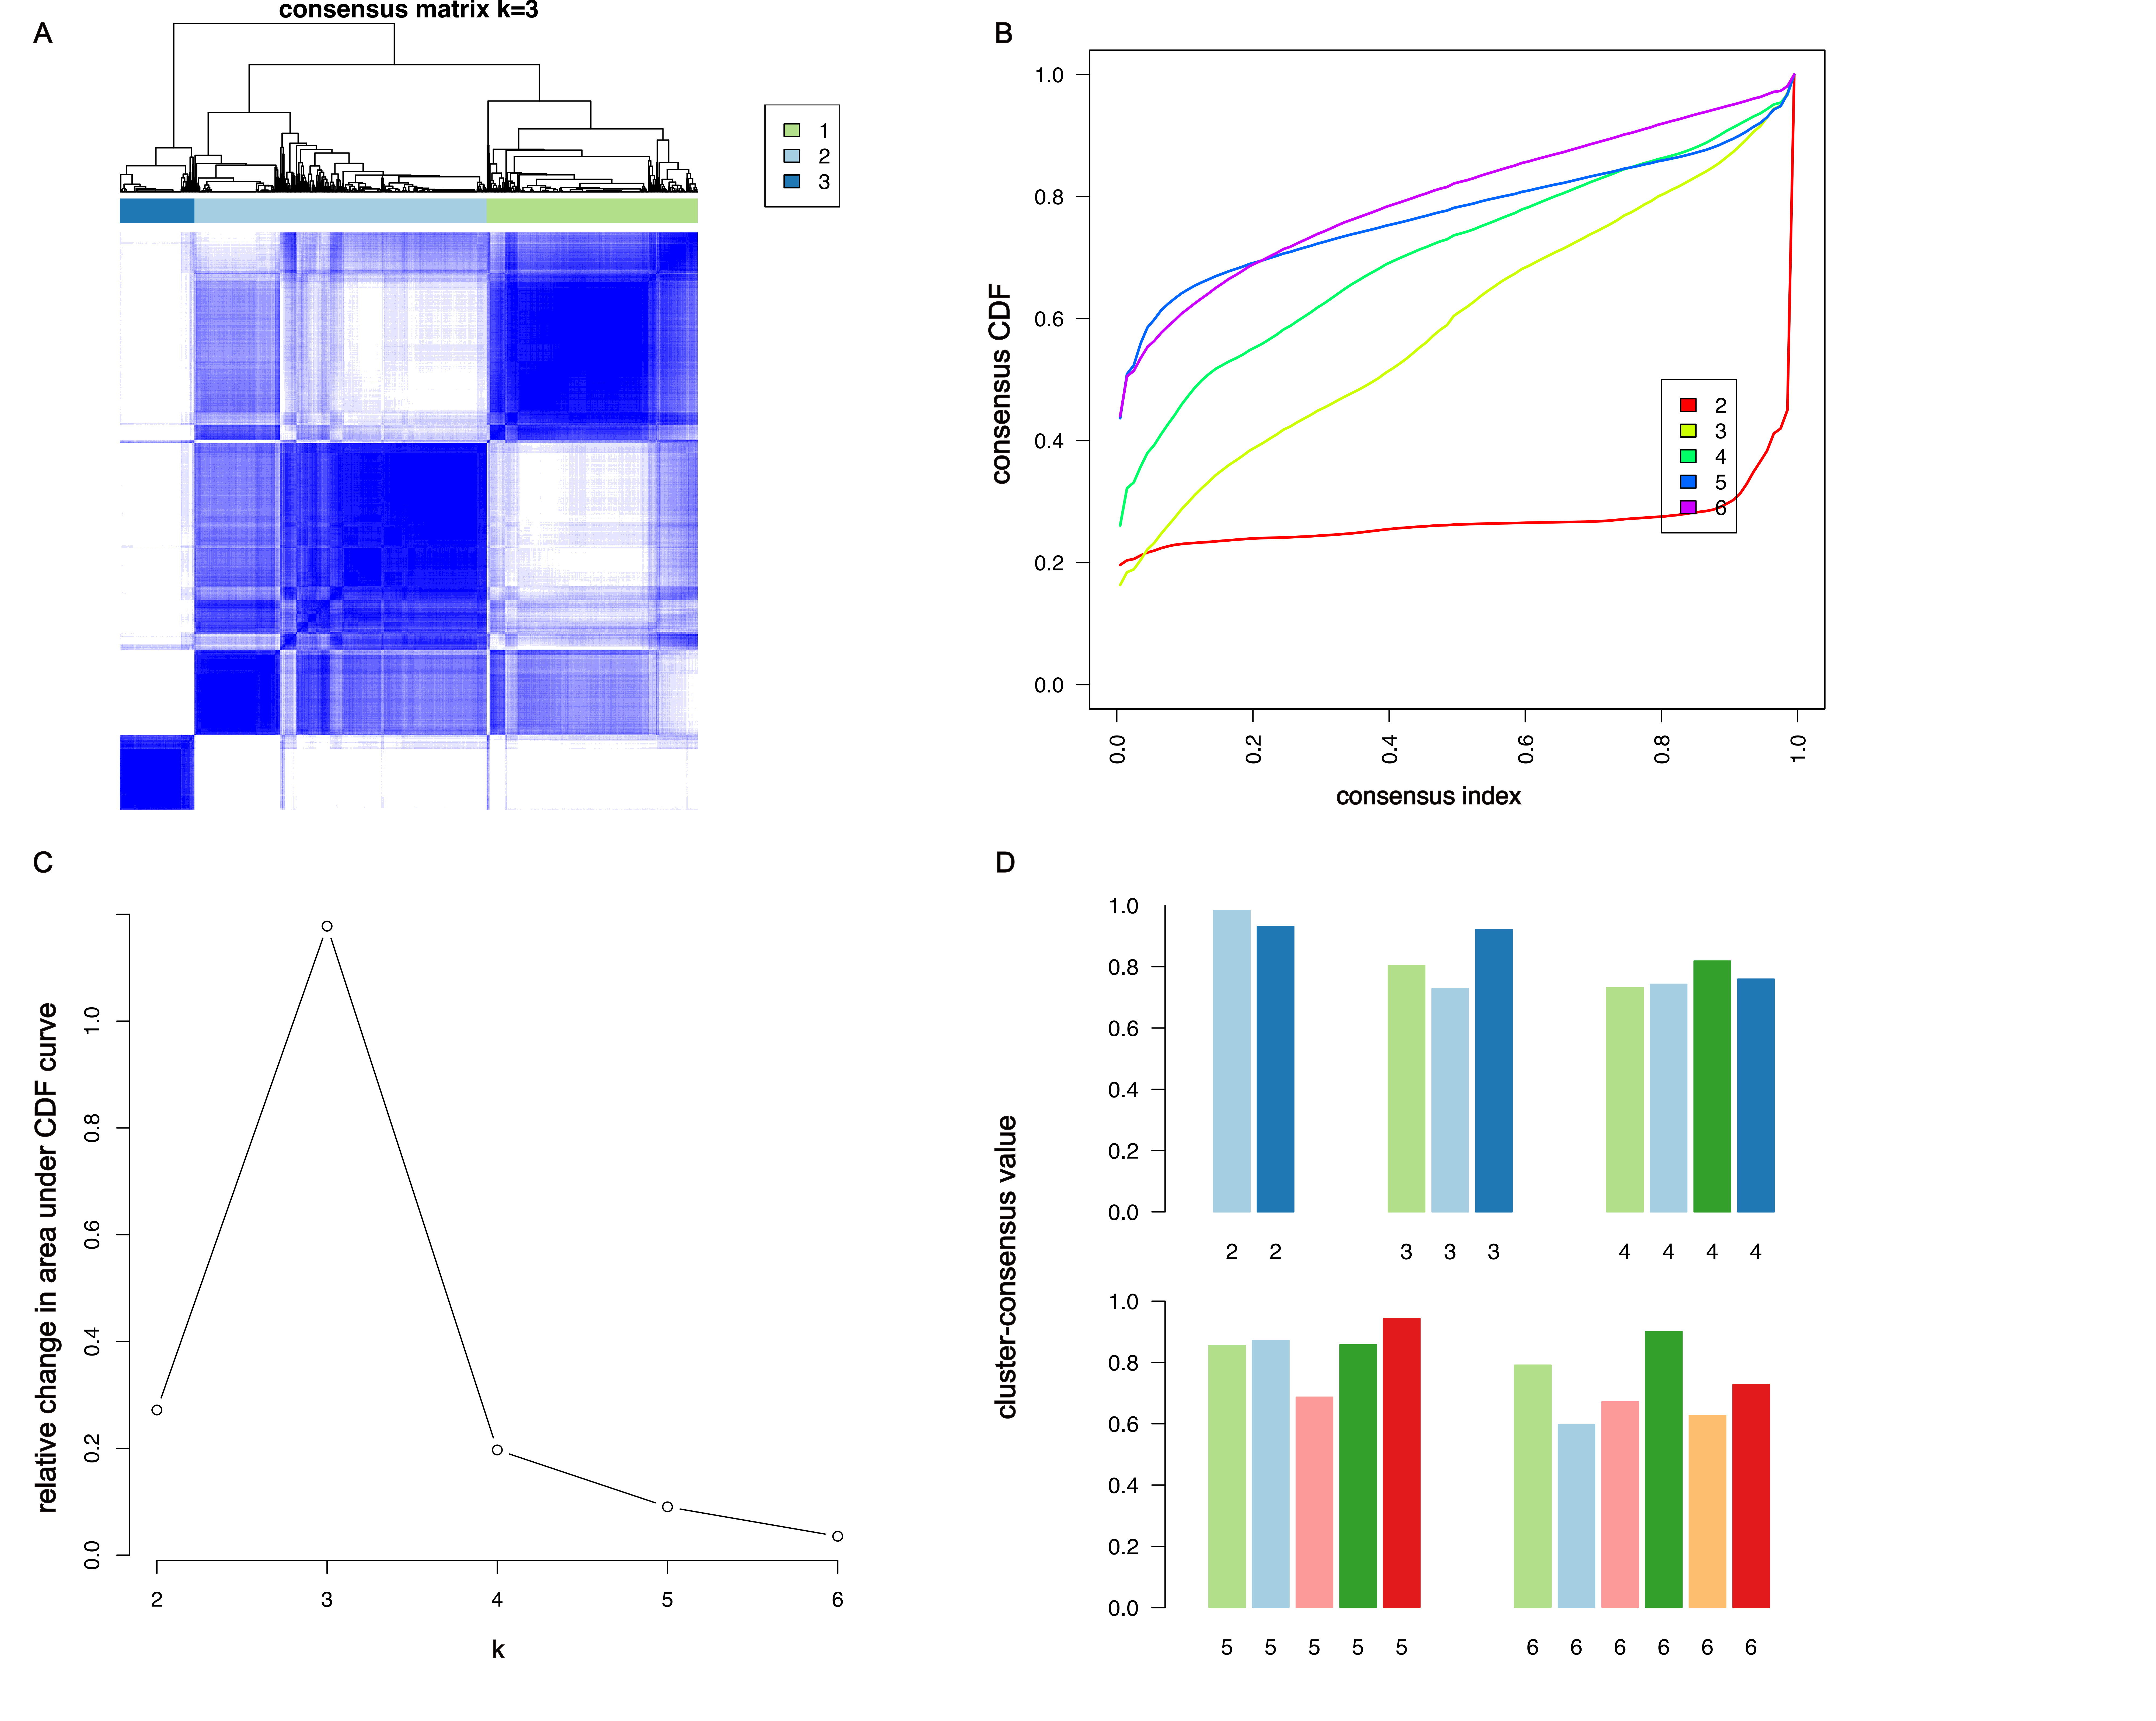
**

A. Consensus matrix heatmap for k = 3 clusters. B. Consensus cumulative distribution function (CDF) plot for k = 2 to k = 6. The consensus CDF curves showed a marked improvement in cluster separation from k=2 to k=3, with only marginal changes observed for higher k values, supporting the selection of three clusters. C. Relative change in the area under the CDF curve as k increases. The relative increase in the area under the CDF curve peaked at k=3 and plateaued thereafter, indicating minimal gain in clustering stability with further increases in k. D. Cluster consensus plot representing pairwise consensus values within each cluster.

**Supplemental Figure 3 Derivation of respiratory phenotypes for ARDS in CDIC including only the patients without chronic lung disease**


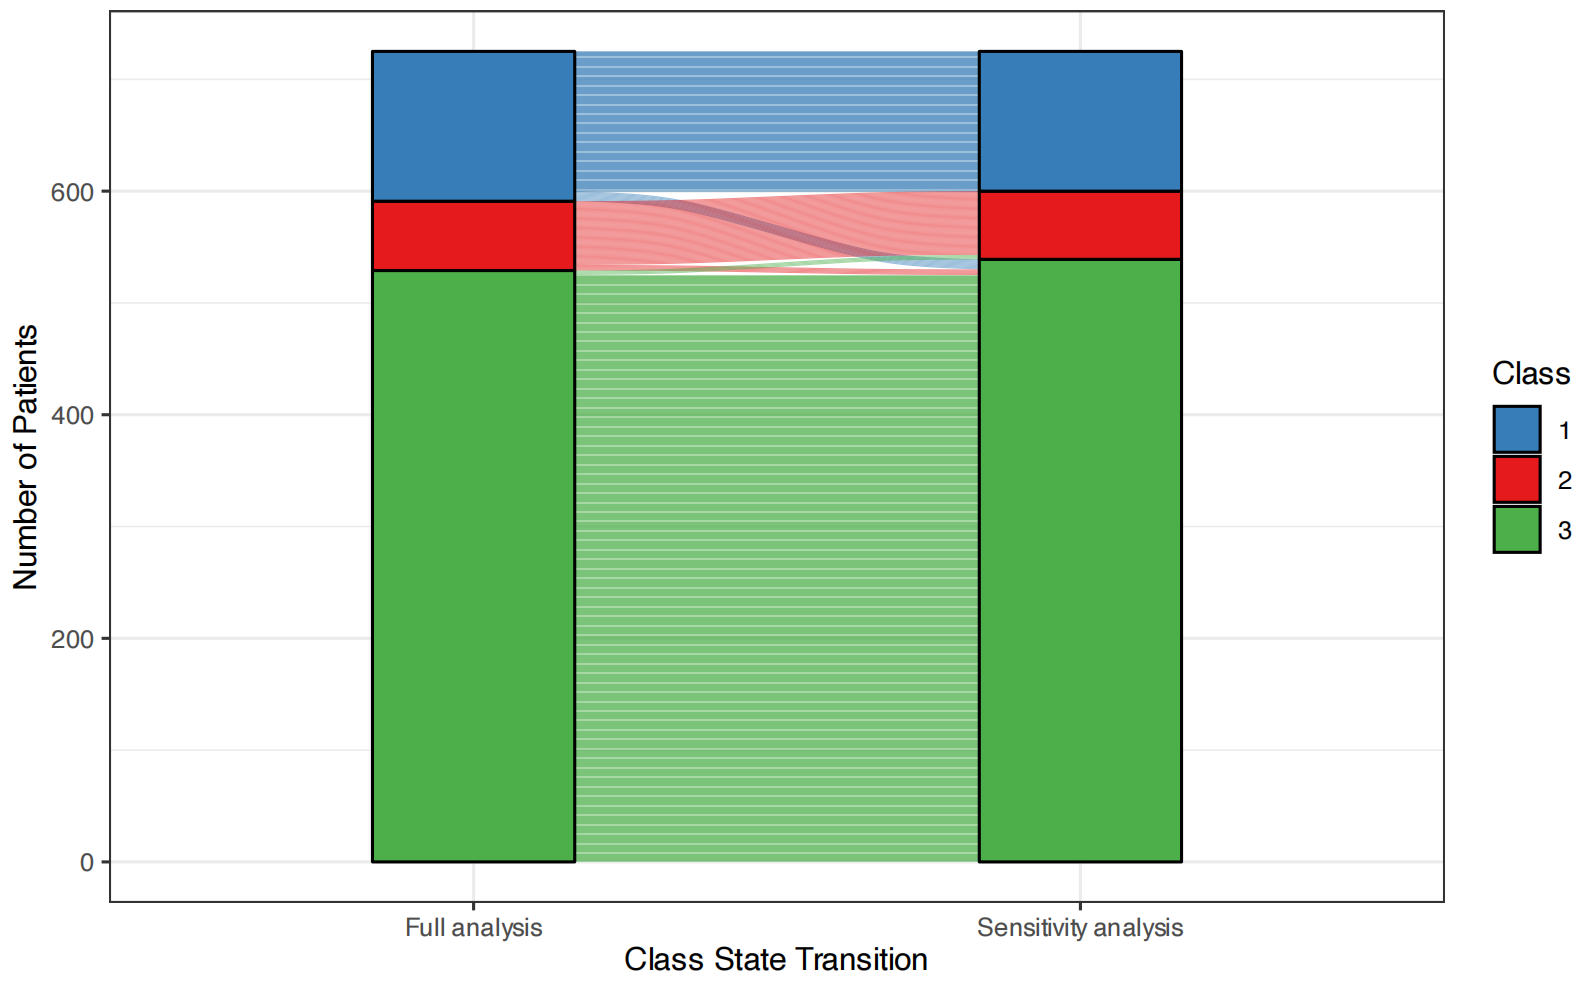


**Supplemental Figure 4 The expression levels of inflammatory markers in different respiratory phenotypes of ARDS**

Panels A-B show the expression levels of interleukin-6 (A) and high-sensitivity C-reactive protein (B) in different respiratory phenotypes.

ARDS: Acute Respiratory Distress Syndrome; IL-6: Interleukin-6; HsCRP: High-sensitivity C-reactive protein.


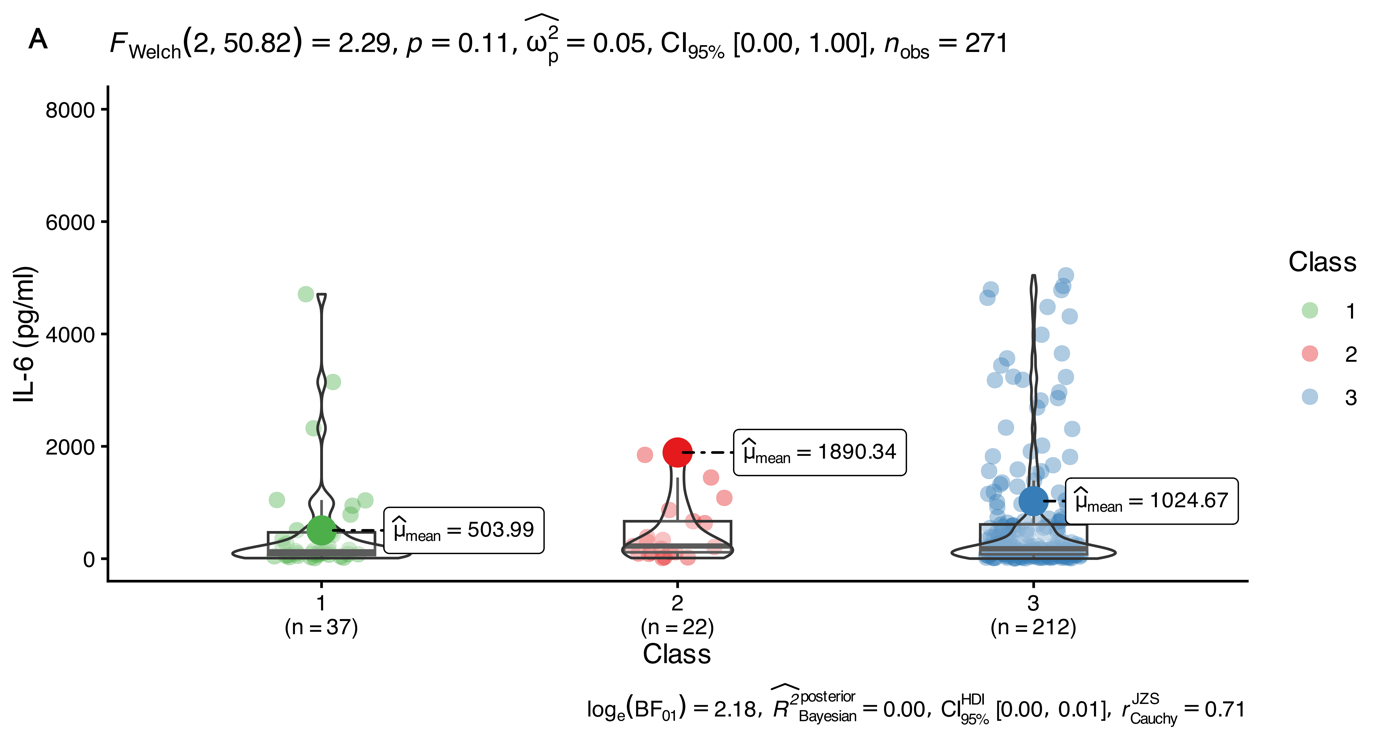


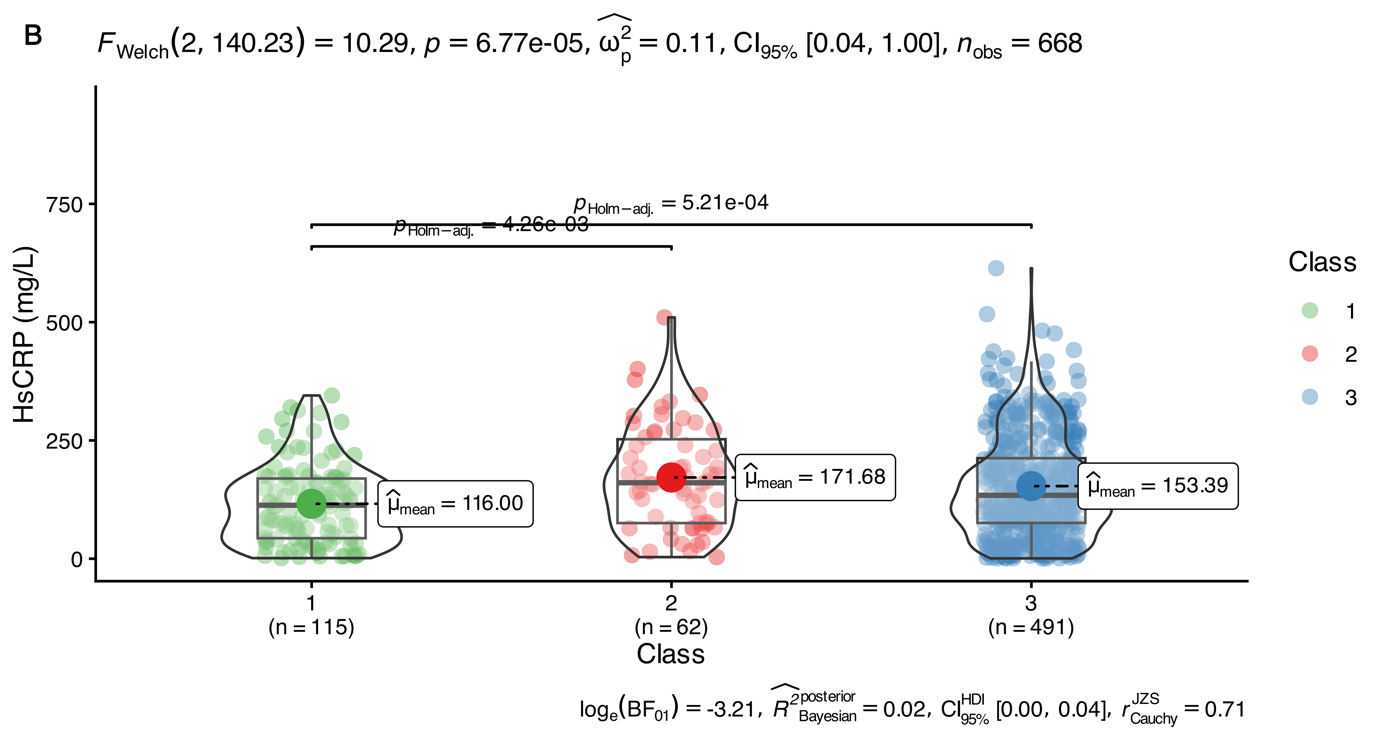


**Supplemental Figure 5 Comparison of dynamic changes of driving pressure, ventilatory ratio and mechanical power between respiratory phenotypes**

**
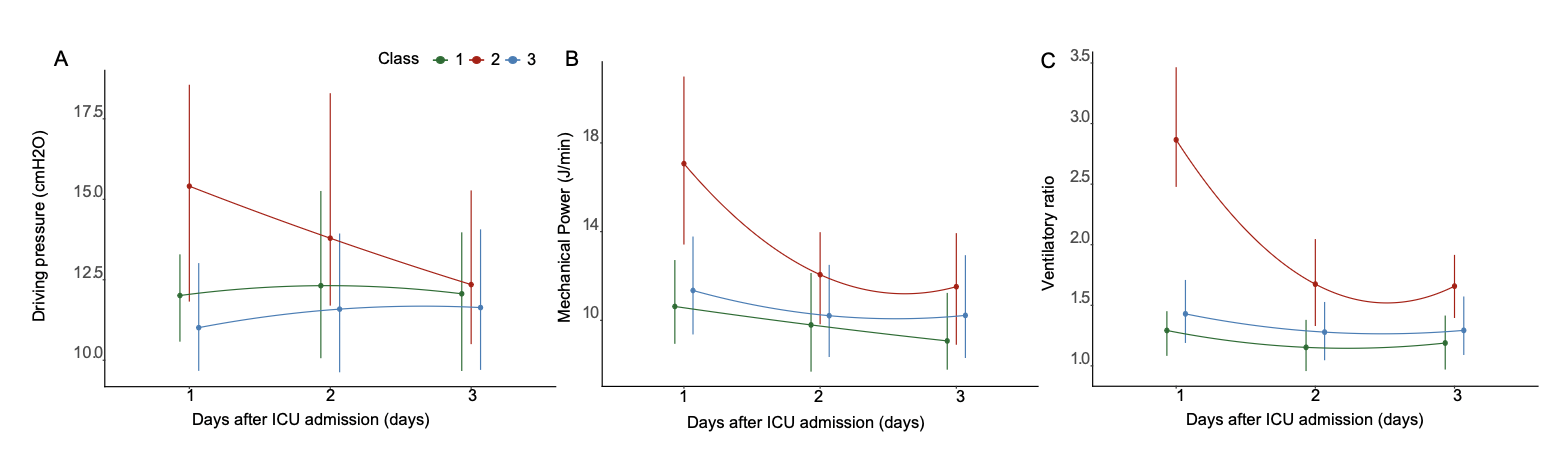
**

**Supplemental Figure 6 Standardized mean differences between respiratory phenotypes in ALVEOLI cohort**

**
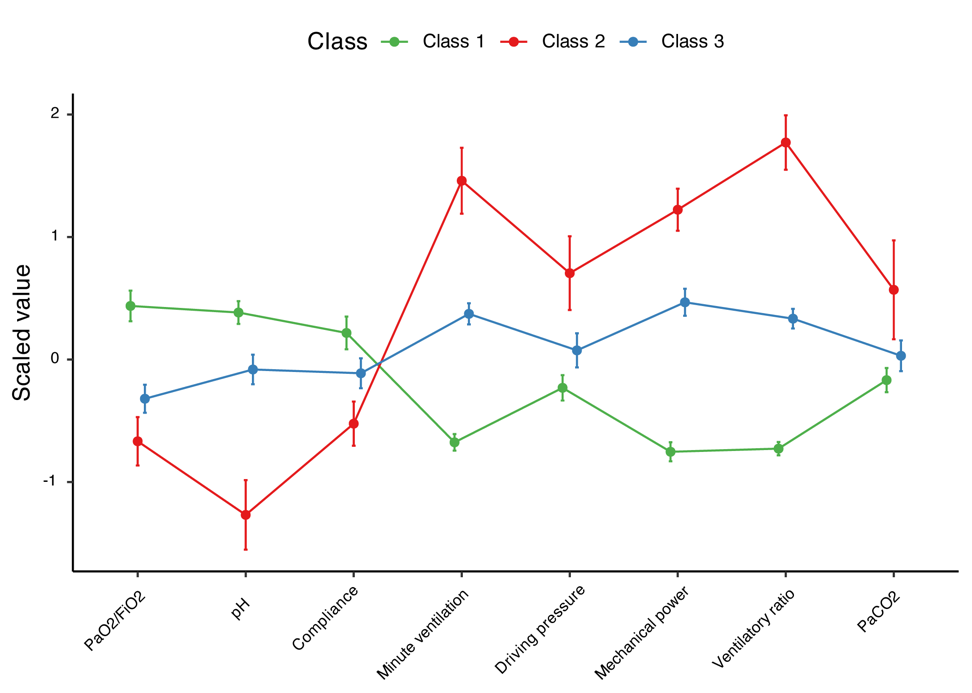
**

**Supplemental Figure 7 ARDS state transition over days 1 and 3 (A) and clinical outcomes by transition status (B) in CDIC**

**A.** **ARDS state transition over days 1 and 3**

**
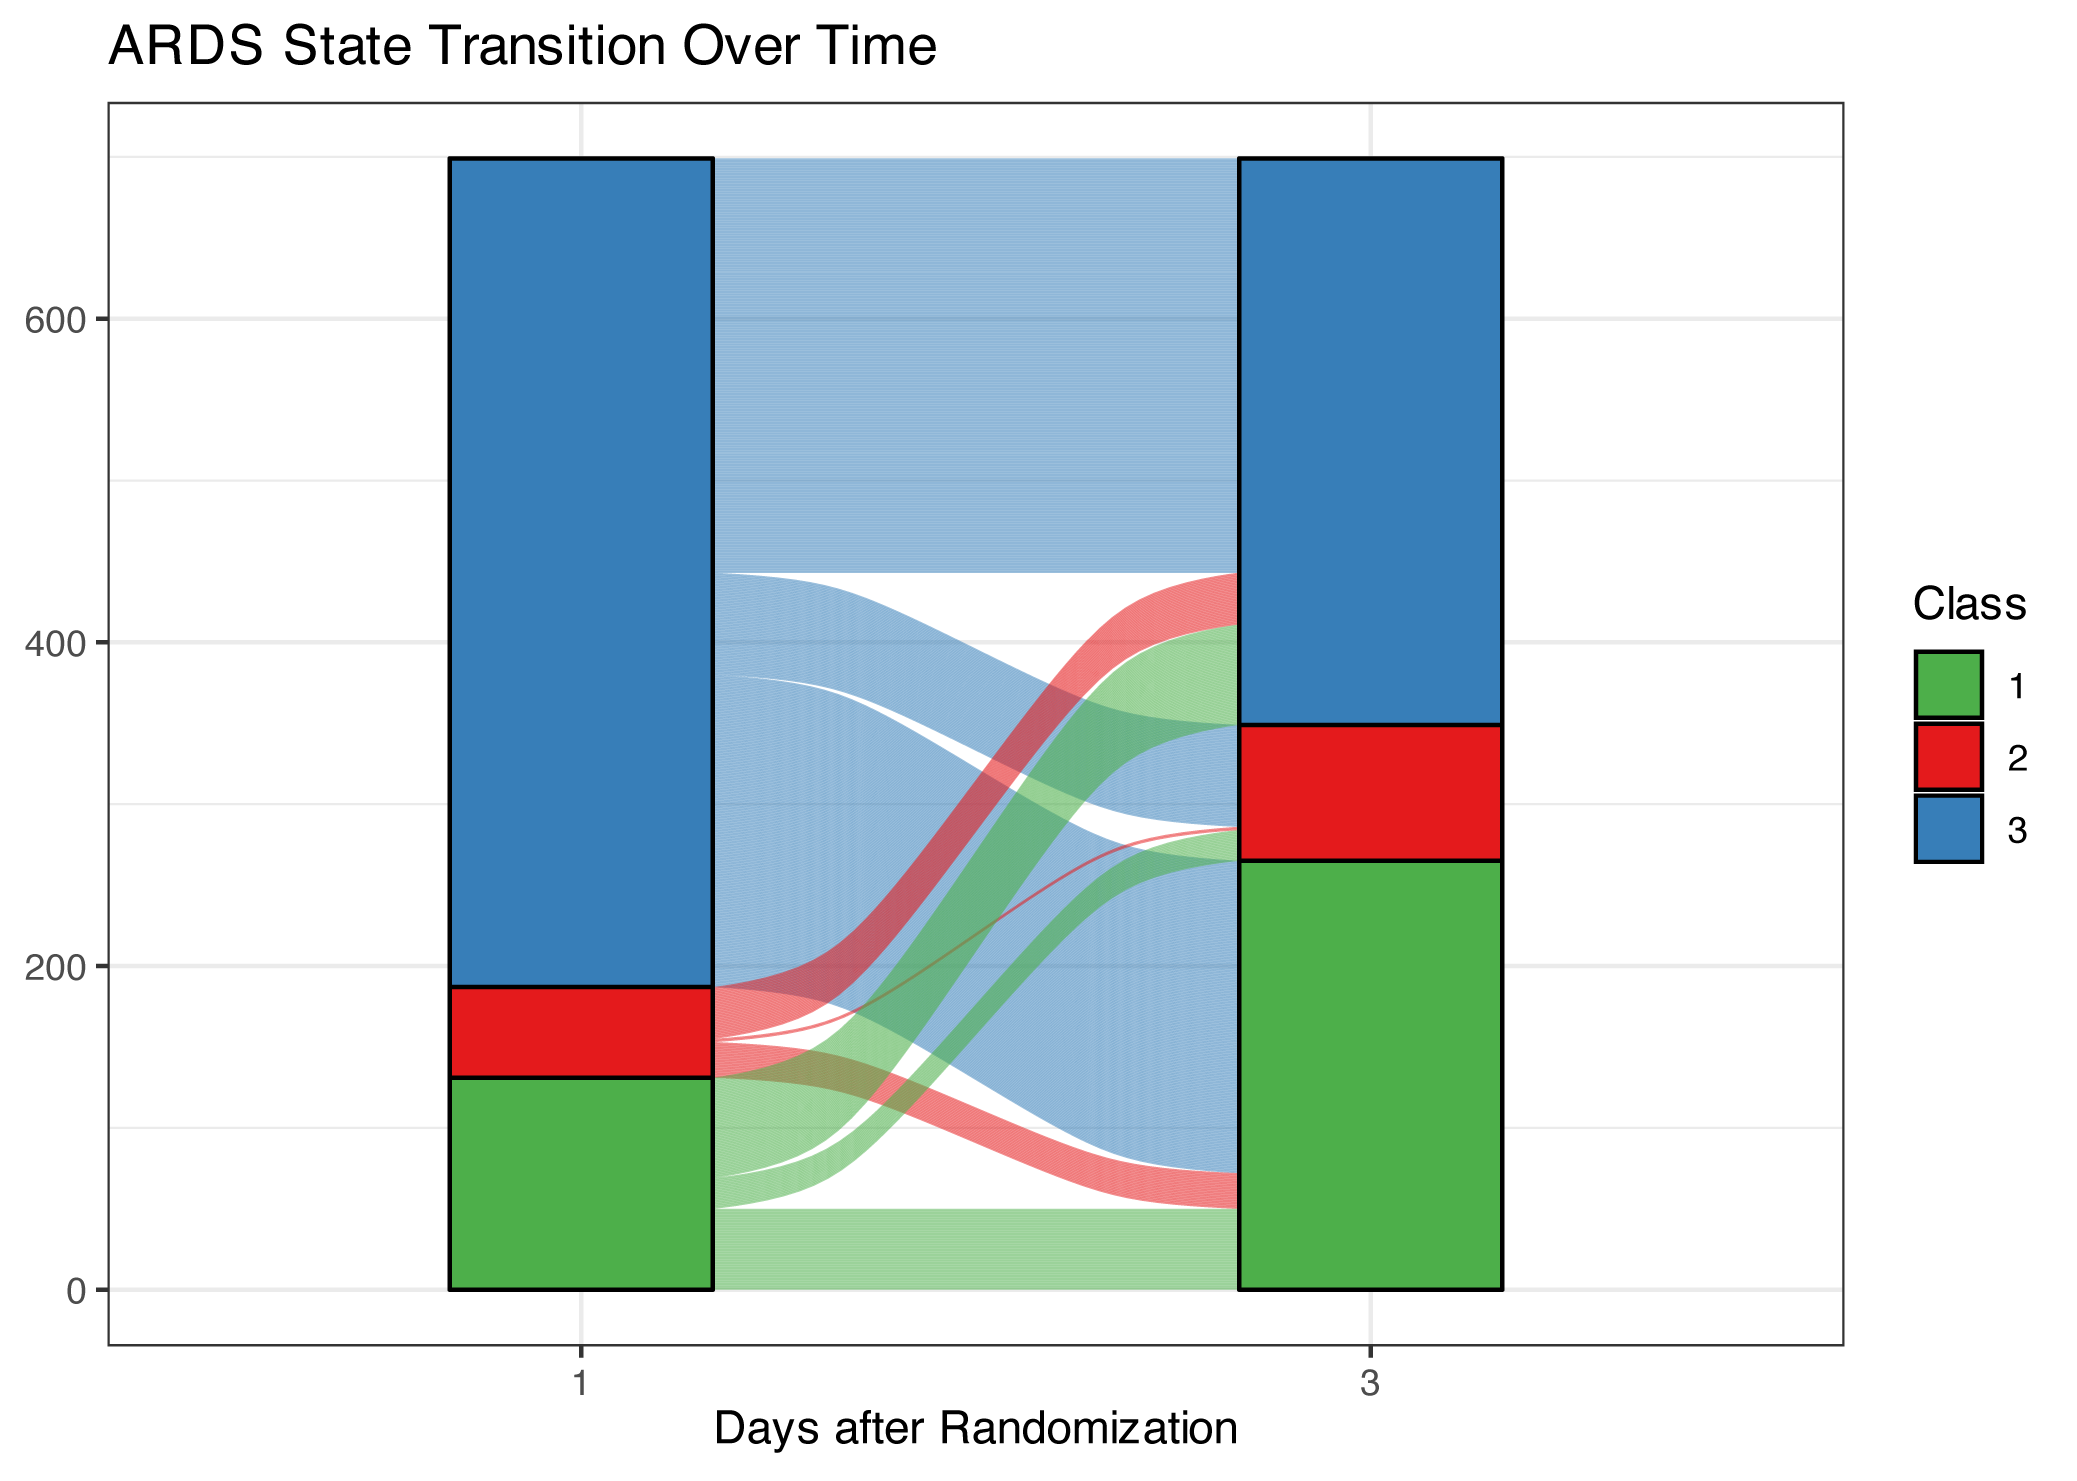
**

**
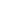
 B.** **Clinical outcomes by transition status**

**
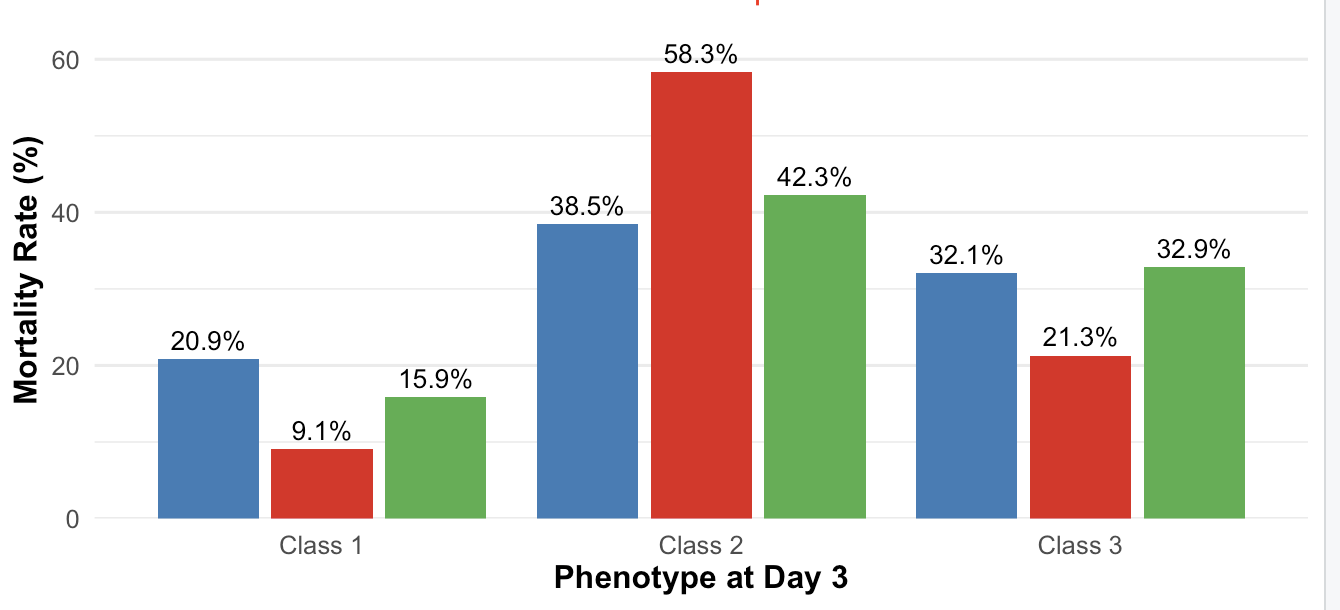
**

**Supplemental Figure 8 ARDS state transition over days 1 and 3 (A) and clinical outcomes by transition status (B) in ALVEOLI**

**A.** **ARDS state transition over days 1 and 3**

**
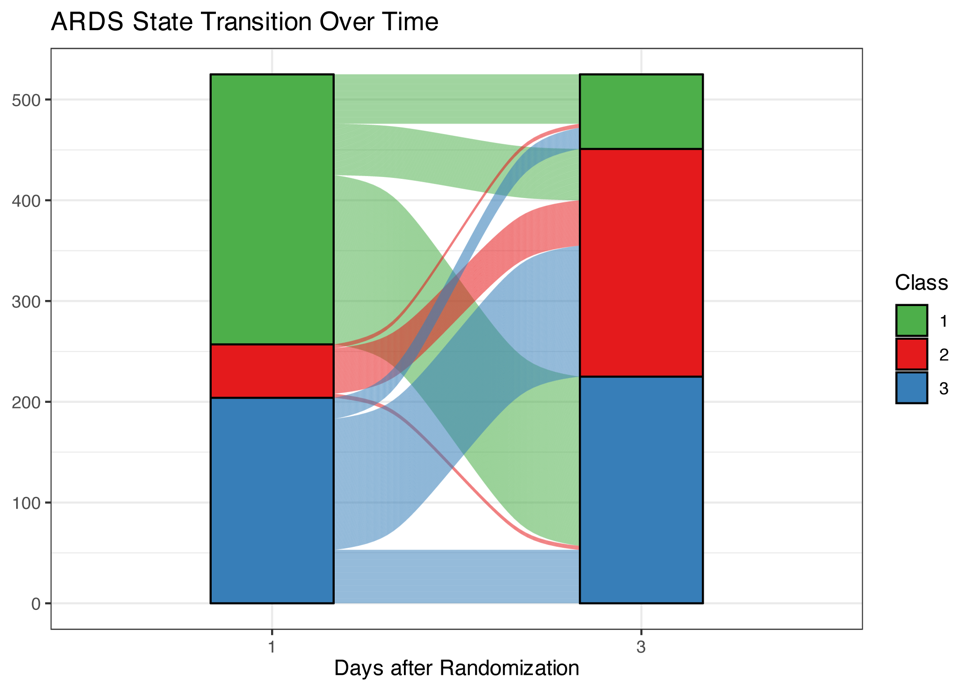
**

**B.** **Clinical outcomes by transition status**

**
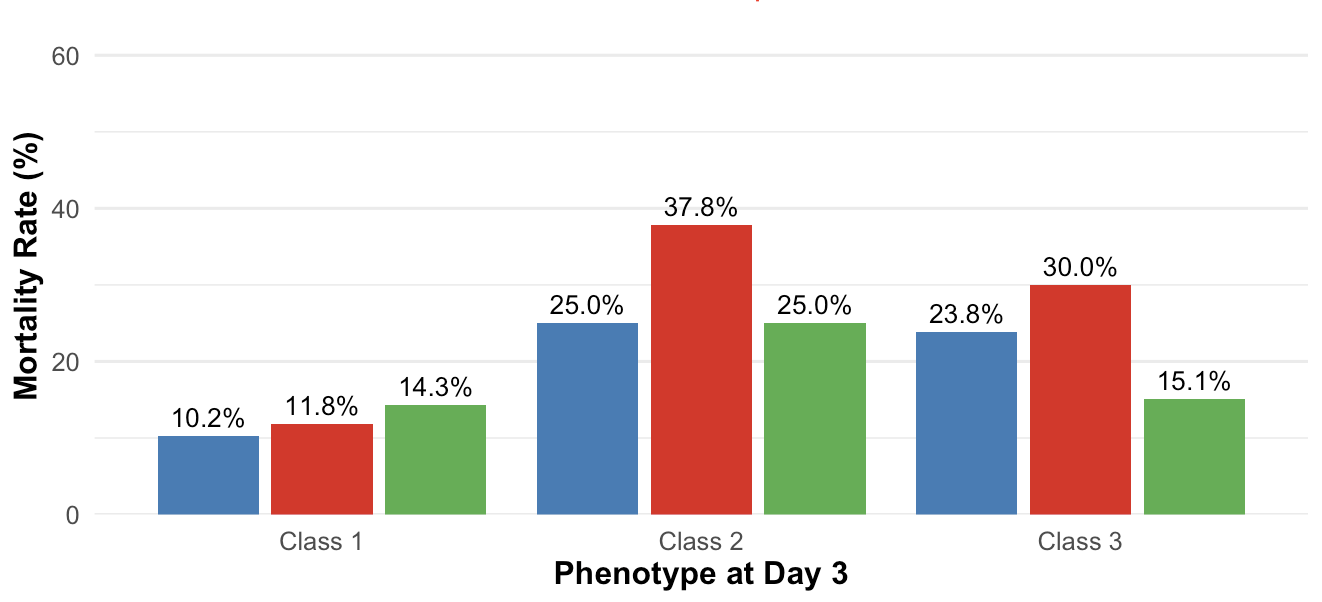
**
